# Supplementary material for: Influence of Work-Family Conflict on Turnover Intention of Primary and Secondary School Teachers: Serial Mediating Role of Psychological Contract and Job Satisfaction
Source: PubMed Central journal article supplement (PMC9086593; doi:10.3389/fpsyt.2022.869344), 2022-04-26
Supplement: Data_Sheet_1.pdf [file Data_Sheet_1.pdf]

## Appendix A

### **Work-Family Conflict Questionnaire**

1. My work requirements have affected my family life
2. My working hours make it difficult for me to meet my family responsibilities
3. Because of the work on me, I didn't finish what I wanted to do
4. My work pressure makes it difficult for me to change my family activity plan
5. Because of my job responsibilities, I must make changes to my family activity plan

### **Psychological Contract Questionnaire**

6. I am willing to cooperate with my colleagues
7. I am willing to help my colleagues
8. I play a good exemplary role in my work
9. My work performance is better than the post requirements
10. I am loyal to the school
11. I am loyal to my superiors

12. I will inform the school in advance when I resign

13. I will not support the school's competitors

### **Job Satisfaction Questionnaire**

14. On the whole, I am satisfied with my work

15. I am generally satisfied with the sense of achievement I get from this job

16. I am generally satisfied with my work in this position

### **Turnover Intention Questionnaire**

17. I have basically never thought of leaving my current school

18. I plan to have long-term career development in this school

19. I often feel bored with my current job and want to change to a new school

20. In the next six months, I will probably leave my current school
